# Supplementary material for: Nitro-Oleic Acid-Mediated Nitroalkylation Modulates the Antioxidant Function of Cytosolic Peroxiredoxin Tsa1 during Heat Stress in Saccharomyces cerevisiae
Source: MDPI journal article supplement (doi:10.3390/antiox11050972), 2022-05-14
Supplement: s1 [file s1]

A) MGSSHHHHHHSSGPQQGLRENLYFQGMVA  
 QVQKQAPTFKKTAVVDGVFDEVSLDKYKGK  
 YVVLAFIPLAFTFVCPTEIIAFSEAAKKFEEQG  
 AQVLFASTDSEYSLLAWTNIPRKEGGLGPINI  
 PLLADTNHSLSRDYGVLIEEEGVALRGLFIID  
 PK  
 GVIRHITINDLPVGRNVDEALRLVEAFQWTD  
 KNGTVLPCNWTPGAATIKPTVEDSKEYFEA  
 ANK

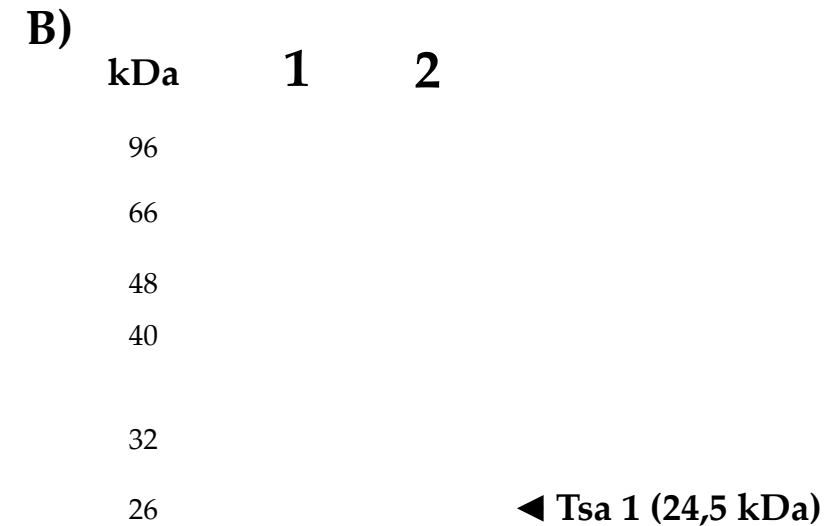

**Supplementary Figure S1.** Analysis of recombinant Tsa1 from *Saccharomyces cerevisiae*. A) Sequence of the recombinant Tsa1. The underlined area represents the His-tag followed by a Tobacco Etch Virus (TEV) protease recognition sequence. B) SDS-PAGE showing the molecular weight of recombinant Tsa1. Line 1: molecular weight markers. Line 2: purified protein.

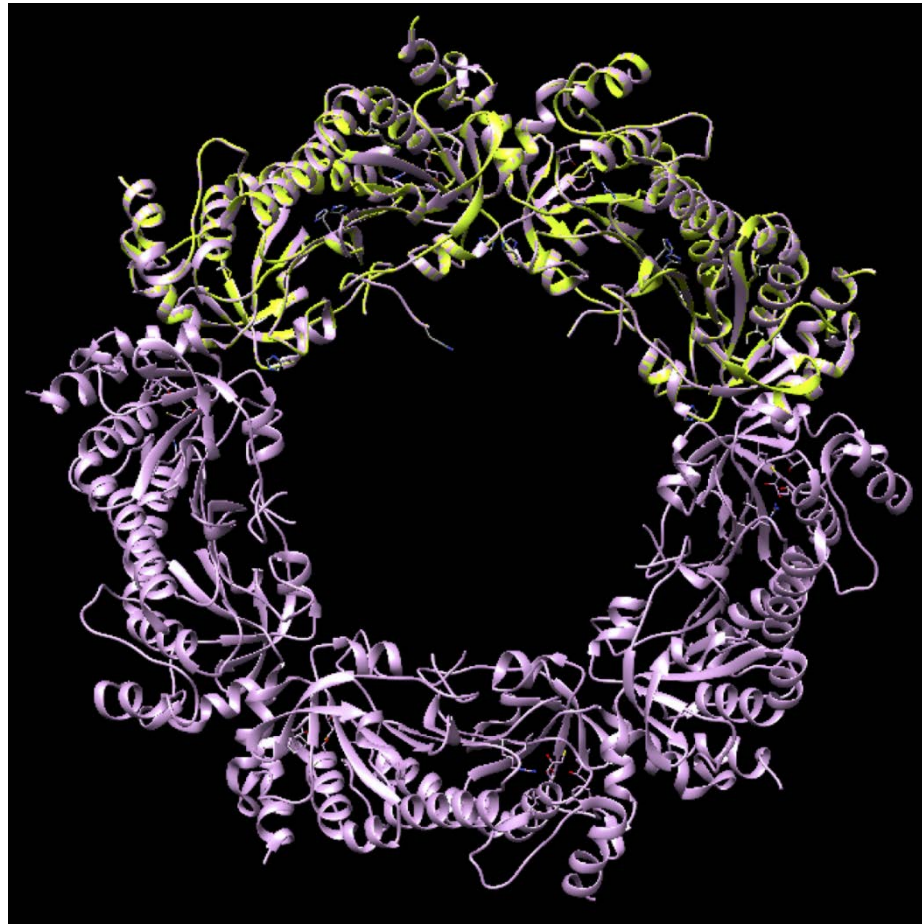

**Supplementary Figure S2.** Structure of the *S. cerevisiae* Tsa1  $[(\alpha_2)_5]$  complex (PDB entry 3SBC) (bright ube) and of the truncated form  $[(\alpha_2)_2]$  (yellow), from [36].

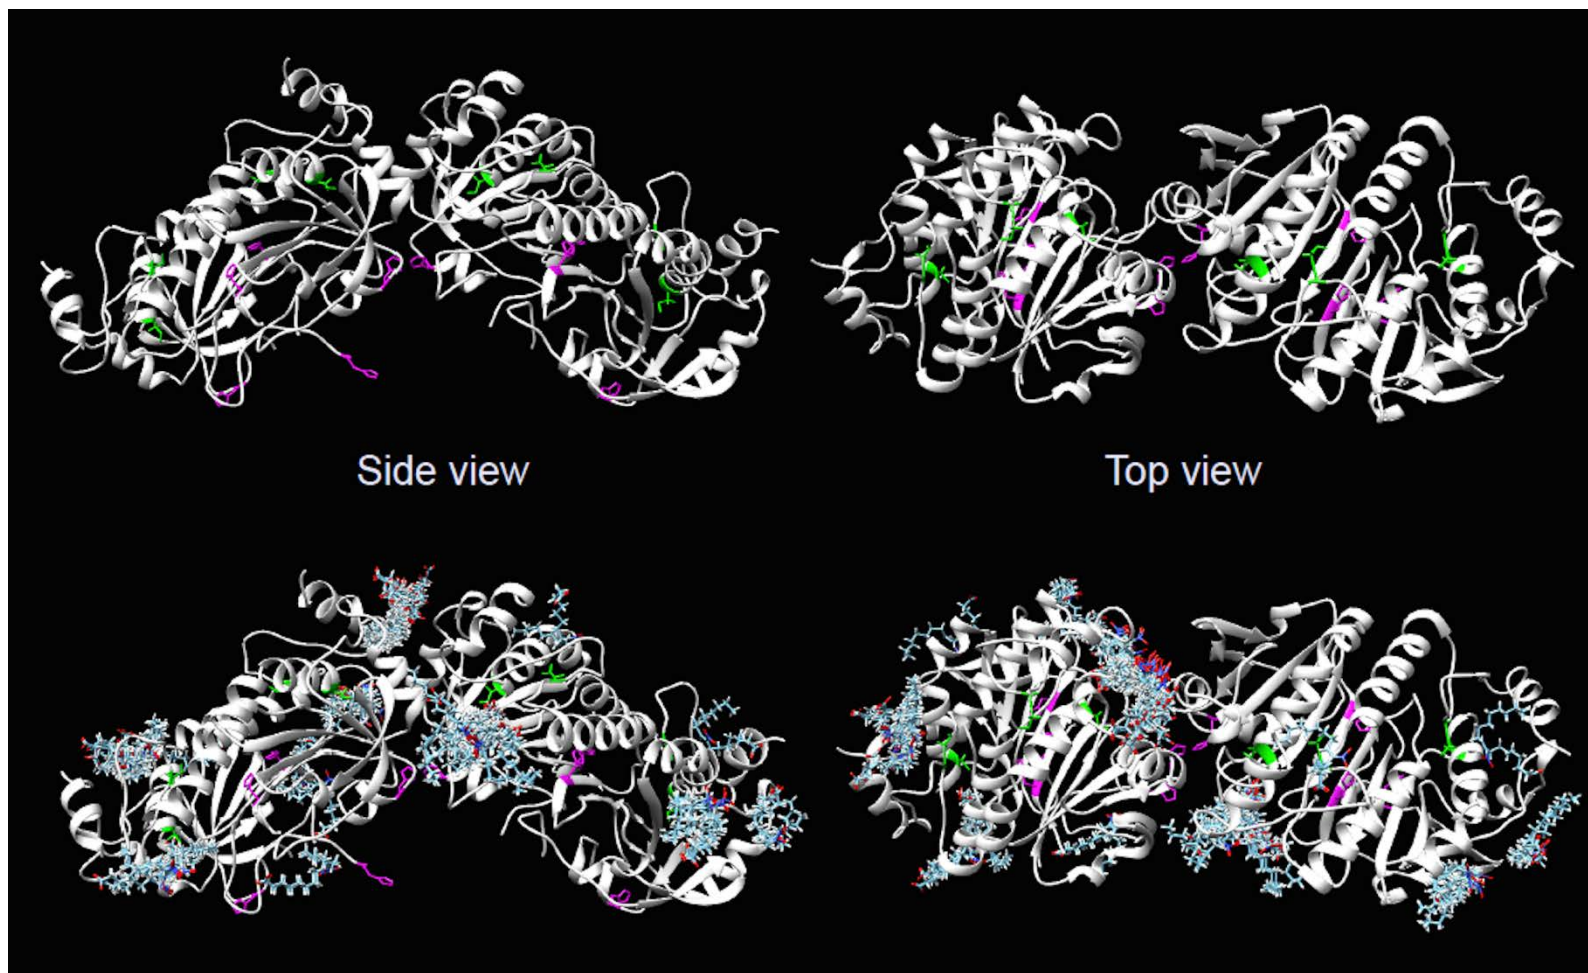

**Supplementary Figure S3.** Structure of the truncated Tsa1 [ $(\alpha_2)_2$ ] from two views (top figures) and mapping of the NO<sub>2</sub>-OA docking (bottom figures).

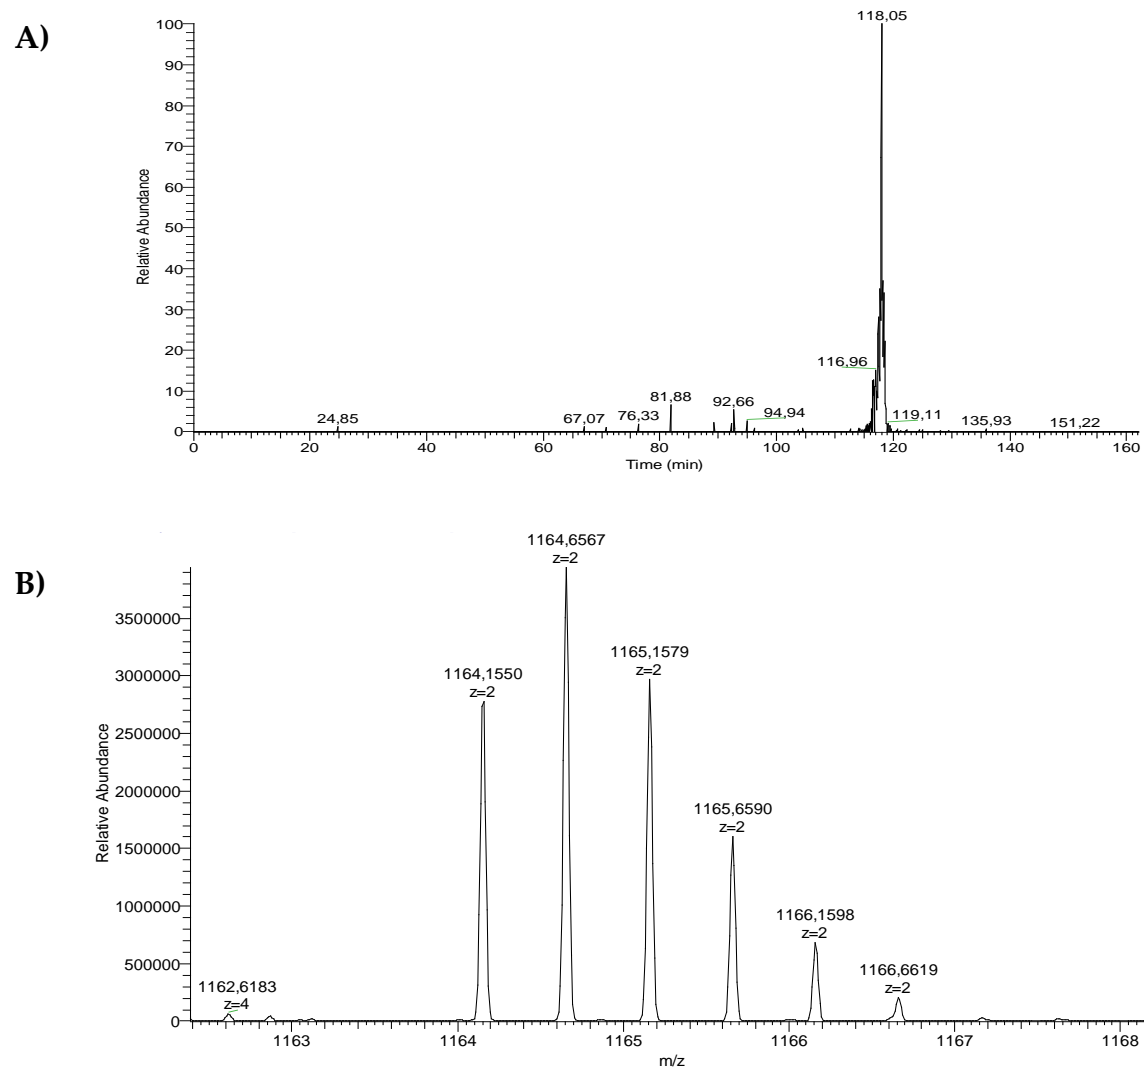

**Supplementary Figure S4.** Extracted ion chromatogram (A) and MS1 mass spectrum (B) of the peptide AFIPLAFTFVcPTEIIAF ( $m/z = 1164,65$ ) which contains nitroalkylated cysteine 47 from the recombinant Tsa1 protein treated with  $\text{NO}_2\text{-OA}$ .

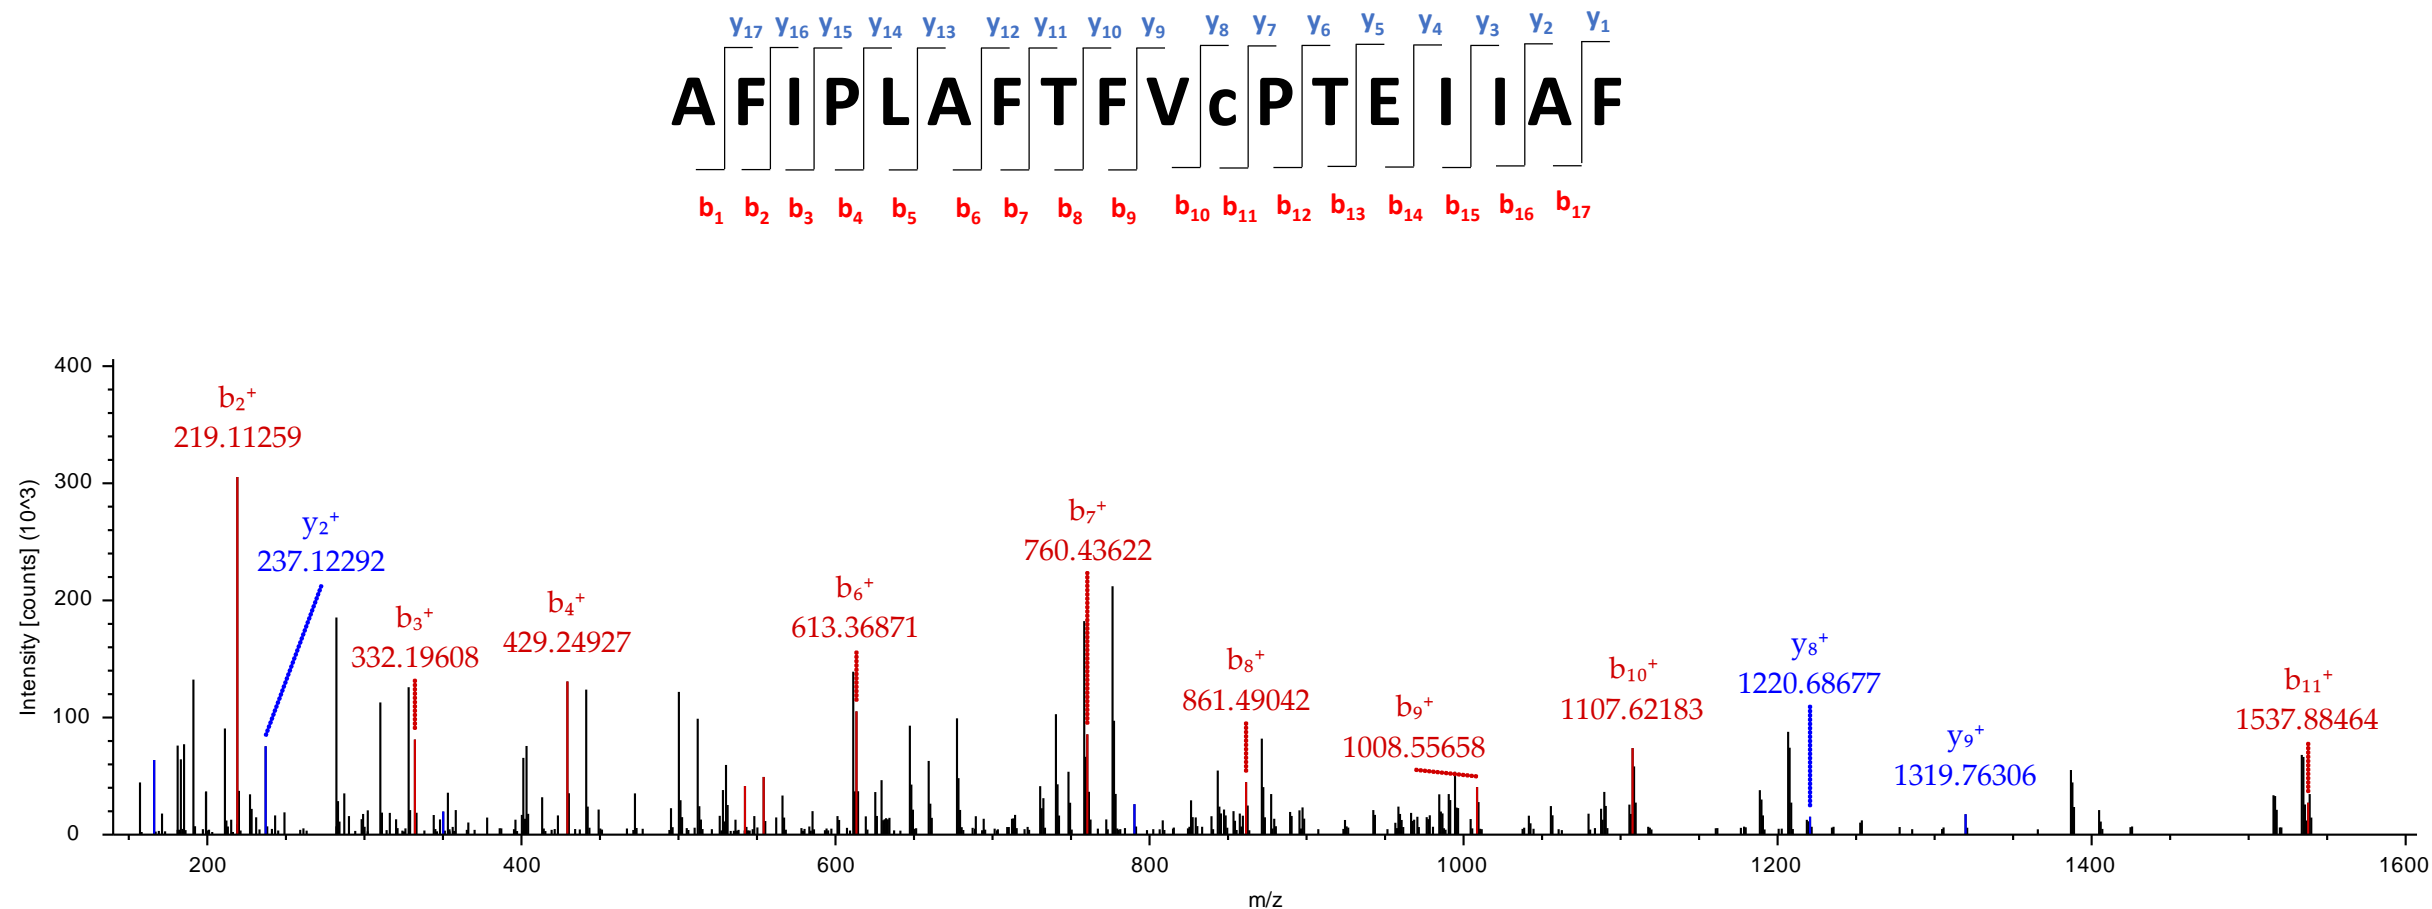

**Supplementary Figure S5.** MS/MS spectrum of the AFIP LAFTFVcPTEIIAF nitroalkylated peptide identified in the recombinant TSA1 protein treated with NO<sub>2</sub>-OA. Fragmentation of the peptide precursor ion generated a series of peptide fragments identified as "b" if the charge was retained at the N-terminus or "y" if the charge remained at the C-terminus. Subscripts indicates the charge of ions.

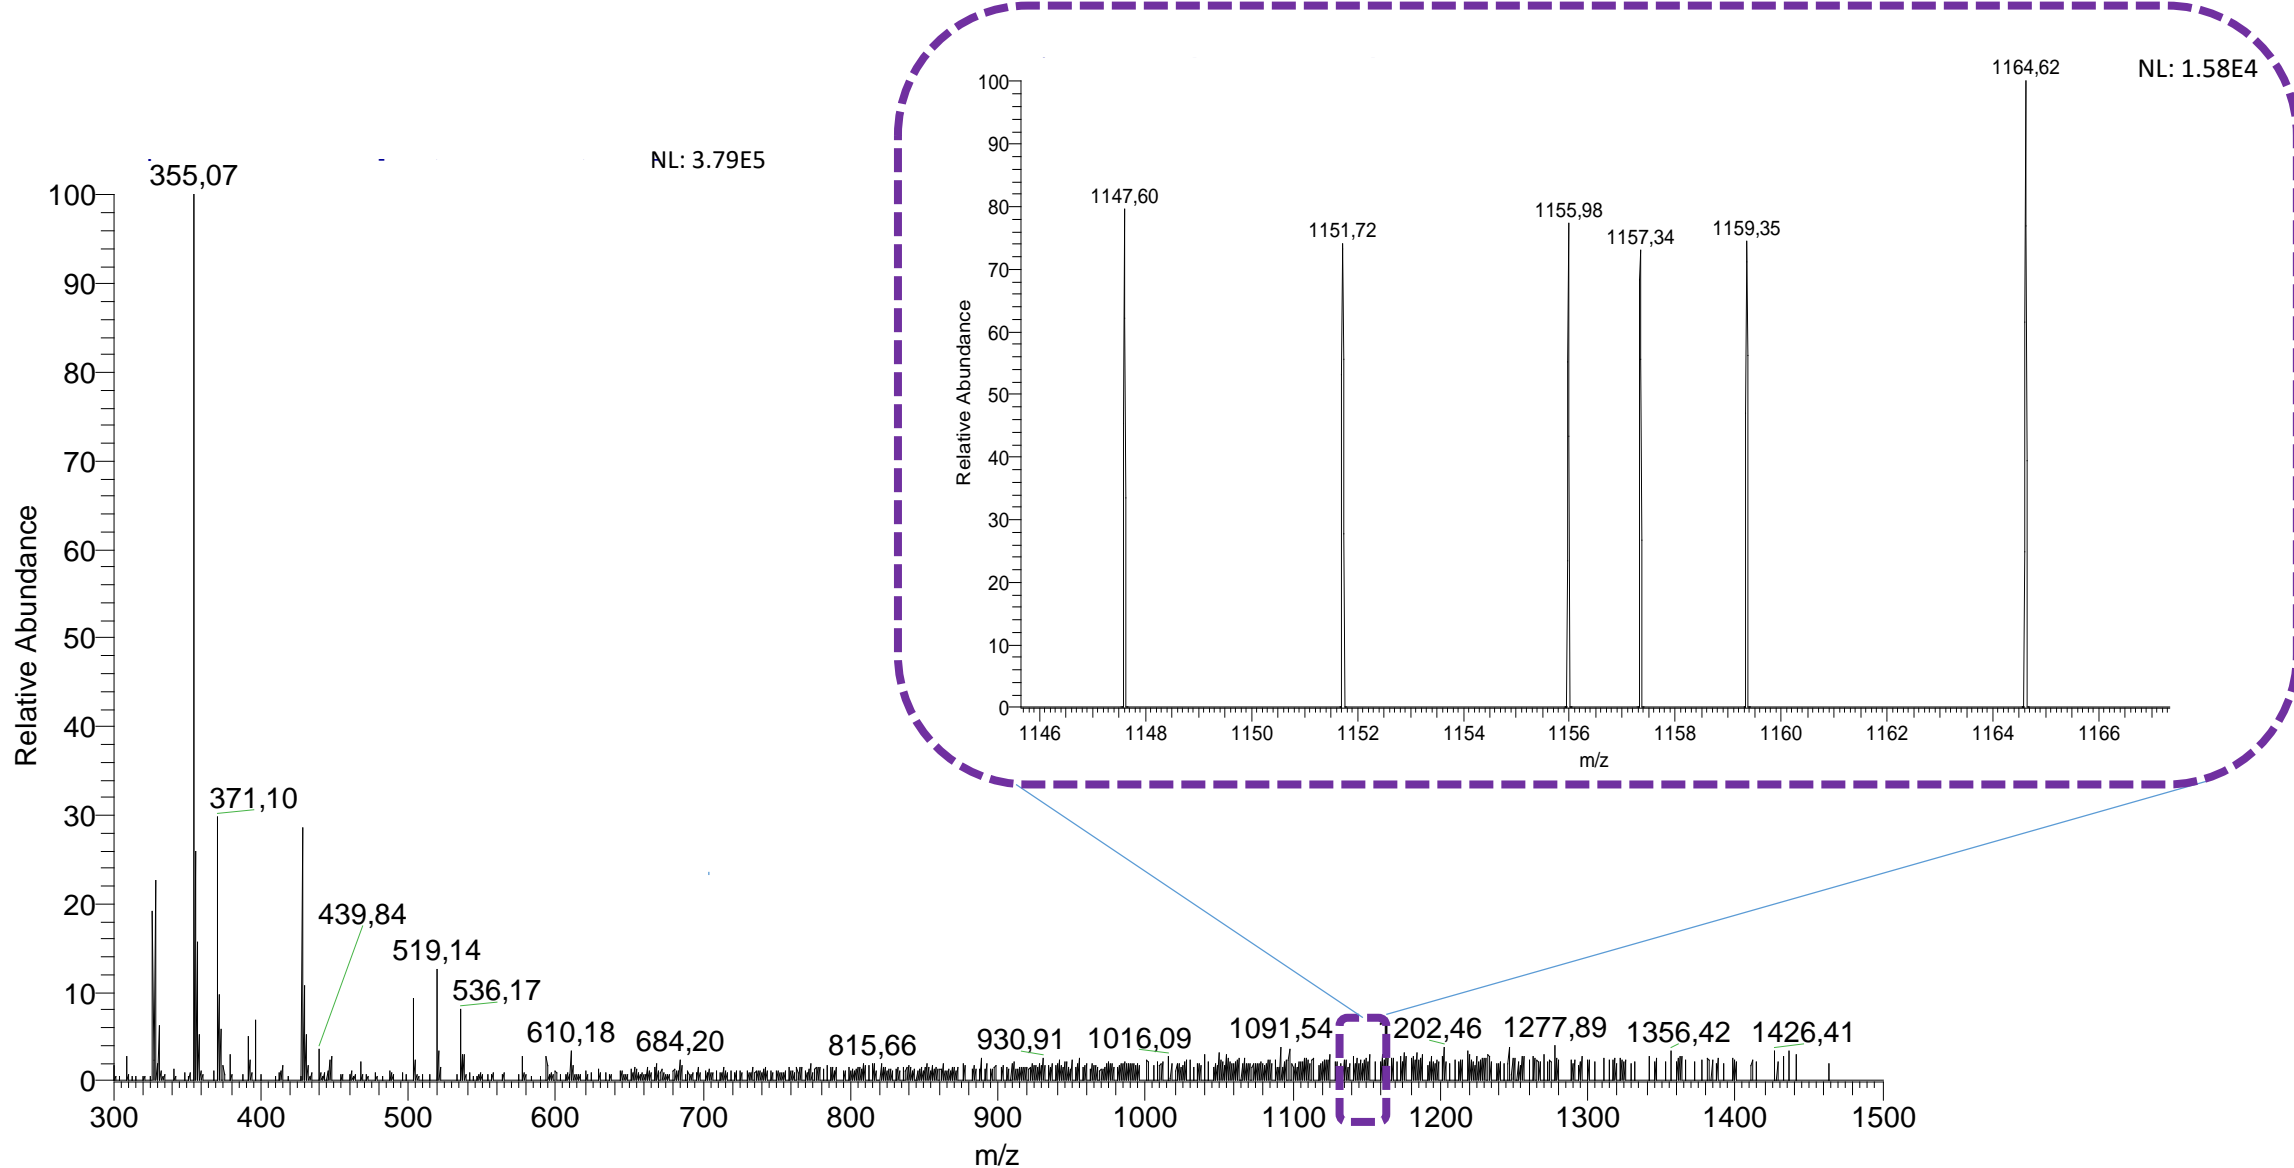

**Supplementary Figure S6.** Mass spectrum corresponding to the MS1 of the control sample where the  $m/z$  1164.62 corresponding to the precursor ion of the AFIPLAFTFVcPTEIIAF peptide which contains the nitroalkylated Cys 47 from *in vivo* Tsa1 is shown. The intensity of the precursor ion was 1.58E4 and was localized at the RT 107.7 min. NL: normalization level.

**Supplemental Table S1.** Chromatographic and spectrometric characterization (experimental peptides, charge, molecular weight and RT) of the precursor ions that contain the targets susceptible to nitroalkylation detected in the recombinant Tsa1 treated with NO<sub>2</sub>-OA. In the table, found the information of the unmodified peptides that contain the target susceptible to nitroalkylation as the nitroalkylated peptides of that target (in the nitroalkylated peptides the target appears in lowercase letters).

| Target residue | Peptide experimentally          | Chemical formula | Molecular weight (Da) | Charge | Retention time RT (min) | Window of RT (min) |
|----------------|---------------------------------|------------------|-----------------------|--------|-------------------------|--------------------|
| Cys 47         | VCPTEIIAF                       | C46H73N9O13S1    | 992,51208             | +1     | 78,5                    | 73-83              |
|                | TFVCPTEIIAF                     | C59H89N11O16S1   | 1240,63037            | +2     | 79,7                    | 75-85              |
|                | TFVcPTEIIAF                     | C77H122N12O20S1  | 1567,8674             | +2     | 104,57                  | 100-110            |
|                | AFIPLAFTFVcPTEIIAF              | C118H179N19O27S1 | 2327,3013             | +2     | 117,63                  | 113-123            |
|                | AFTFVcPTEIIAF                   | C89H136N14O22S1  | 1785,9745             | +2     | 107,61                  | 103-113            |
| Cys 170        | TDKNGTVLPCNW                    | C58H90N16O19S1   | 1347,63457            | +2     | 42,05                   | 37-47              |
|                | TDKNGTVLPcNW                    | C76H123N17O23S1  | 1674,8759             | +2     | 85,18                   | 80-90              |
|                | TDKNGTVLPcNWTPGAATIKPTVEDSKEY   | C155H248N36O51S1 | 3462,7828             | +4     | 65,84                   | 60-70              |
|                | QWTDKNGTVLPcNW                  | C92H141N21O26S1  | 1989,0121             | +2     | 83,73                   | 79-89              |
| His 104        | TNIPRKEGGLGPINIPLLADTNHSL       | C116H194N34O36   | 2640,44472            | +4     | 44,68                   | 39-50              |
|                | LADTNHSLSRDY                    | C58H90N18O22     | 1391,65557            | +2     | 21,59                   | 16-27              |
|                | ADTNHSLSRDY                     | C52H79N17O21     | 1278,57085            | +3     | 18,96                   | 13-24              |
|                | LADTNhSLSRDY                    | C76H123N19O26    | 1718,8925             | +3     | 61,88                   | 56-66              |
|                | ADTNhSLSRDY                     | C70H112N18O25    | 1605,8095             | +3     | 59,54                   | 55-65              |
|                | LADTNhSL                        | C54H92N12O18     | 1197,6737             | +2     | 66,52                   | 61-71              |
| His 135        | IIDPKGVRHITINDLPVGRNVDEAL       | C127H215N37O38   | 2867,5997             | +3     | 46,19                   | 41-51              |
|                | IIDPKGVRHITINDLPVGRNVDEALRL     | C139H238N42O40   | 3136,7875             | +5     | 47,04                   | 42-52              |
|                | IIDPKGVRHITINDLPVGRNVDEALRLVEAF | C161H268N46O46   | 3583,0099             | +3     | 57,71                   | 52-62              |
|                | IIDPKGVRhITINDLPVGRNVDEAL       | C145H248N38O42   | 3194,8492             | +3     | 65,96                   | 60-70              |

**Supplementary Table S2.** Characteristic m/z ratio and chromatographic retention time (RT) of peptides obtained from the nitroalkylation of recombinant Tsa1.

| Nitroalkylated target | Standard of Nitroalkylation: recombinant Tsa1 treated with NO <sub>2</sub> -OA |        |        |
|-----------------------|--------------------------------------------------------------------------------|--------|--------|
|                       | Nitroalkylated peptide                                                         | m/z    | RT     |
| Cys 47                | TFVcPTEIIAF                                                                    | 784,9  | 104,57 |
|                       | AFIPLAFTFVcPTEIIAF                                                             | 1164,6 | 117,63 |
|                       | AFTFVcPTEIIAF                                                                  | 893,9  | 107,6  |
| Cys 171               | TDKNGTVLPcNW                                                                   | 838,4  | 85,18  |
|                       | TDKNGTVLPcNWTPGAATIKPTVEDSKEY                                                  | 866,6  | 65,84  |
|                       | QWTDKNGTVLPcNW                                                                 | 995,5  | 83,73  |
| His 105               | LADTNhSLSRDY                                                                   | 573,9  | 61,88  |
|                       | ADTNhSLSRDY                                                                    | 536,2  | 59,54  |
|                       | LADTNhSL                                                                       | 599,8  | 66,52  |
| His 136               | IIDPKGVIrhITINDLPVGRNVDEAL                                                     | 1065,9 | 65,96  |
